# Supplementary material for: Conjugation of hydrophobic moieties enhances potency of antisense oligonucleotides in the muscle of rodents and non-human primates
Source: PubMed Central journal article supplement — Nucleic Acids Res. 2019 May 11;47(12):6045–58. doi: 10.1093/nar/gkz360 (PMC6614849; doi:10.1093/nar/gkz360), 2019-05-11
Supplement: gkz360_supplemental_file.pdf [file gkz360_supplemental_file.pdf]

## Supplementary Material

### **Conjugation of hydrophobic moieties enhances potency of antisense oligonucleotides in the muscle of rodents and non-human primates**

Michael E. Oestergaard, Michaela Jackson, Audrey Low, Alfred Chappell, Richard Lee, Rachel Q. Peralta, Jinghua Yu, Garth A. Kinberger, Amy Dan, Rick Carty, Michael Tanowitz, Patrick Anderson, Tae-Won Kim, Linda Fradkin, Sue Murray, Frank Rigo, Thazha P. Prakash, C. Frank Bennett, Eric. E. Swayze, Hans J. Gaus, Punit P. Seth.

Ionis Pharmaceuticals, 2855 Gazelle Court, Carlsbad, CA 92010, U.S.A.

Address correspondence to [pseth@ionisph.com](mailto:pseth@ionisph.com)

| ASO            | Sequence (5' to 3')           | MW calculated | MW found | UV purity |
|----------------|-------------------------------|---------------|----------|-----------|
| A-malat        | GCATTCTAATAGCAGC-A647         | 7355.4        | 7354.8   | 98.2 %    |
| Toc-malat-647  | Toc-TCAGCATTCTAATAGCAGC-A647  | 8108.2        | 8107.7   | 97.7 %    |
| Palm-malat-647 | Palm-TCAGCATTCTAATAGCAGC-A647 | 7821.0        | 7820.5   | 98.5 %    |
| Chol-malat-647 | Chol-TCAGCATTCTAATAGCAGC-A647 | 8085.3        | 8085.0   | 99.0 %    |
| Toc-malat      | Toc-TCAGCATTCTAATAGCAGC       | 7040.0        | 7038.8   | 99.6 %    |
| Palm-malat     | Palm-TCAGCATTCTAATAGCAGC      | 6752.8        | 6751.4   | 93.9 %    |
| Chol-malat     | Chol-TCAGCATTCTAATAGCAGC      | 7017.1        | 7016.2   | 97.6 %    |
| Palm-dmpk1     | Palm-HA-TCACAATAAATACCGAGG    | 6780.8        | 6780.9   | 95.2 %    |
| Palm-dmpk2     | Palm-HA-ACAATAAATACCGAGG      | 5812.0        | 5811.6   | 96.2 %    |
| Palm-dmpk3     | Palm-HA-HDO-ACAATAAATACCGAGG  | 6040.3        | 6039.3   | 98.3 %    |
| Chol-dmpk      | Chol-TCACAATAAATACCGAGG       | 7045.1        | 7044.0   | 98.4 %    |
| Toc-dmpk       | Toc-TCACAATAAATACCGAGG        | 7068.1        | 7067.3   | 96.9 %    |

**Supplementary Figure S1.** Analytical data for ASOs. **cEt**, DNA, All ASOs are fully PS-modified except underlined nucleotides are PO, Palm=palmitic acid, Chol=cholesterol, Toc=tocopherol, A647-Alexa647, HDO=hexanediol.

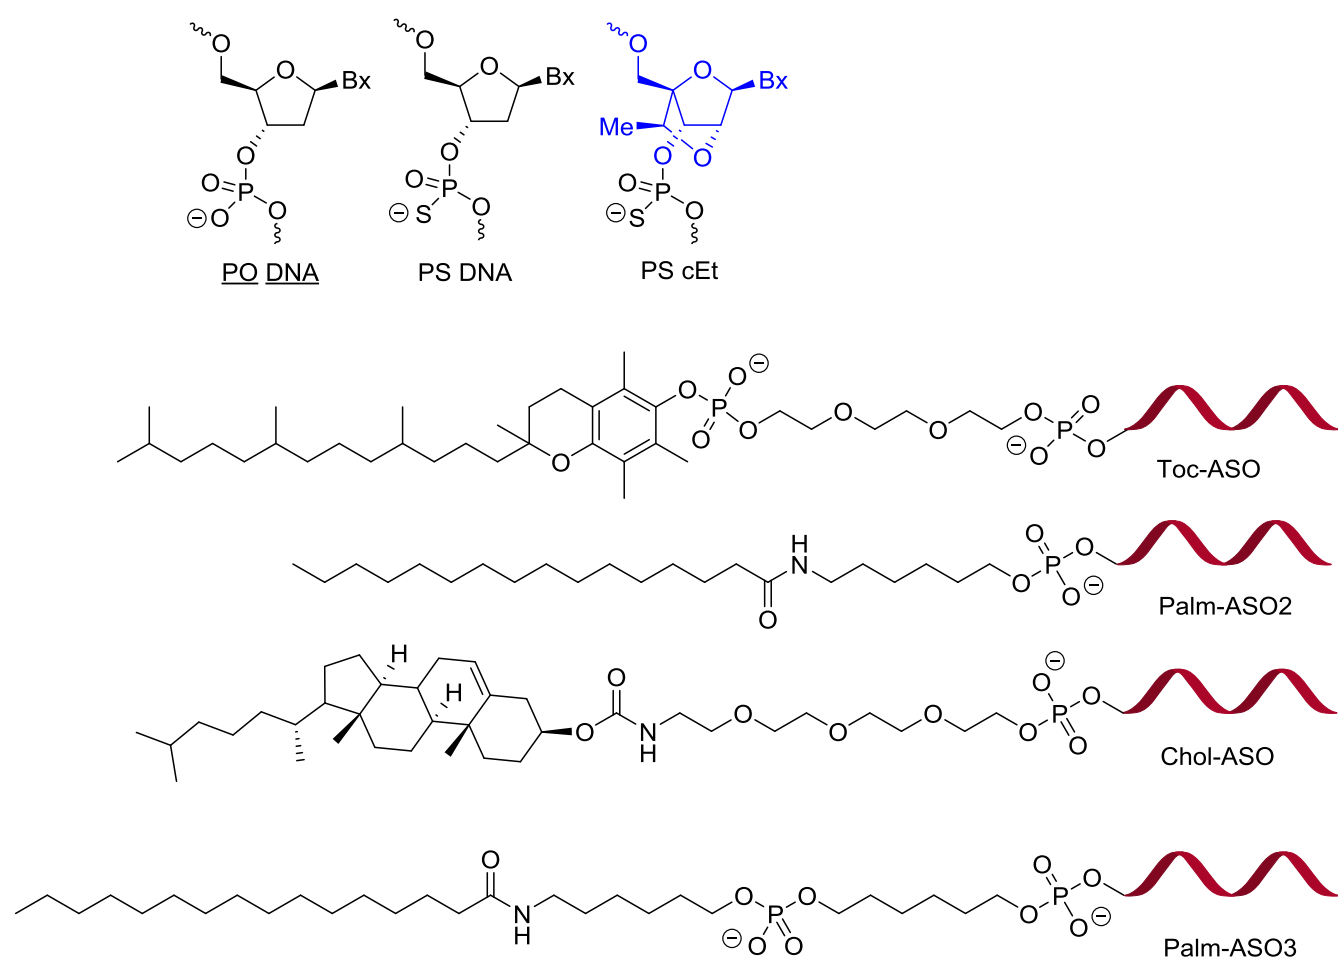

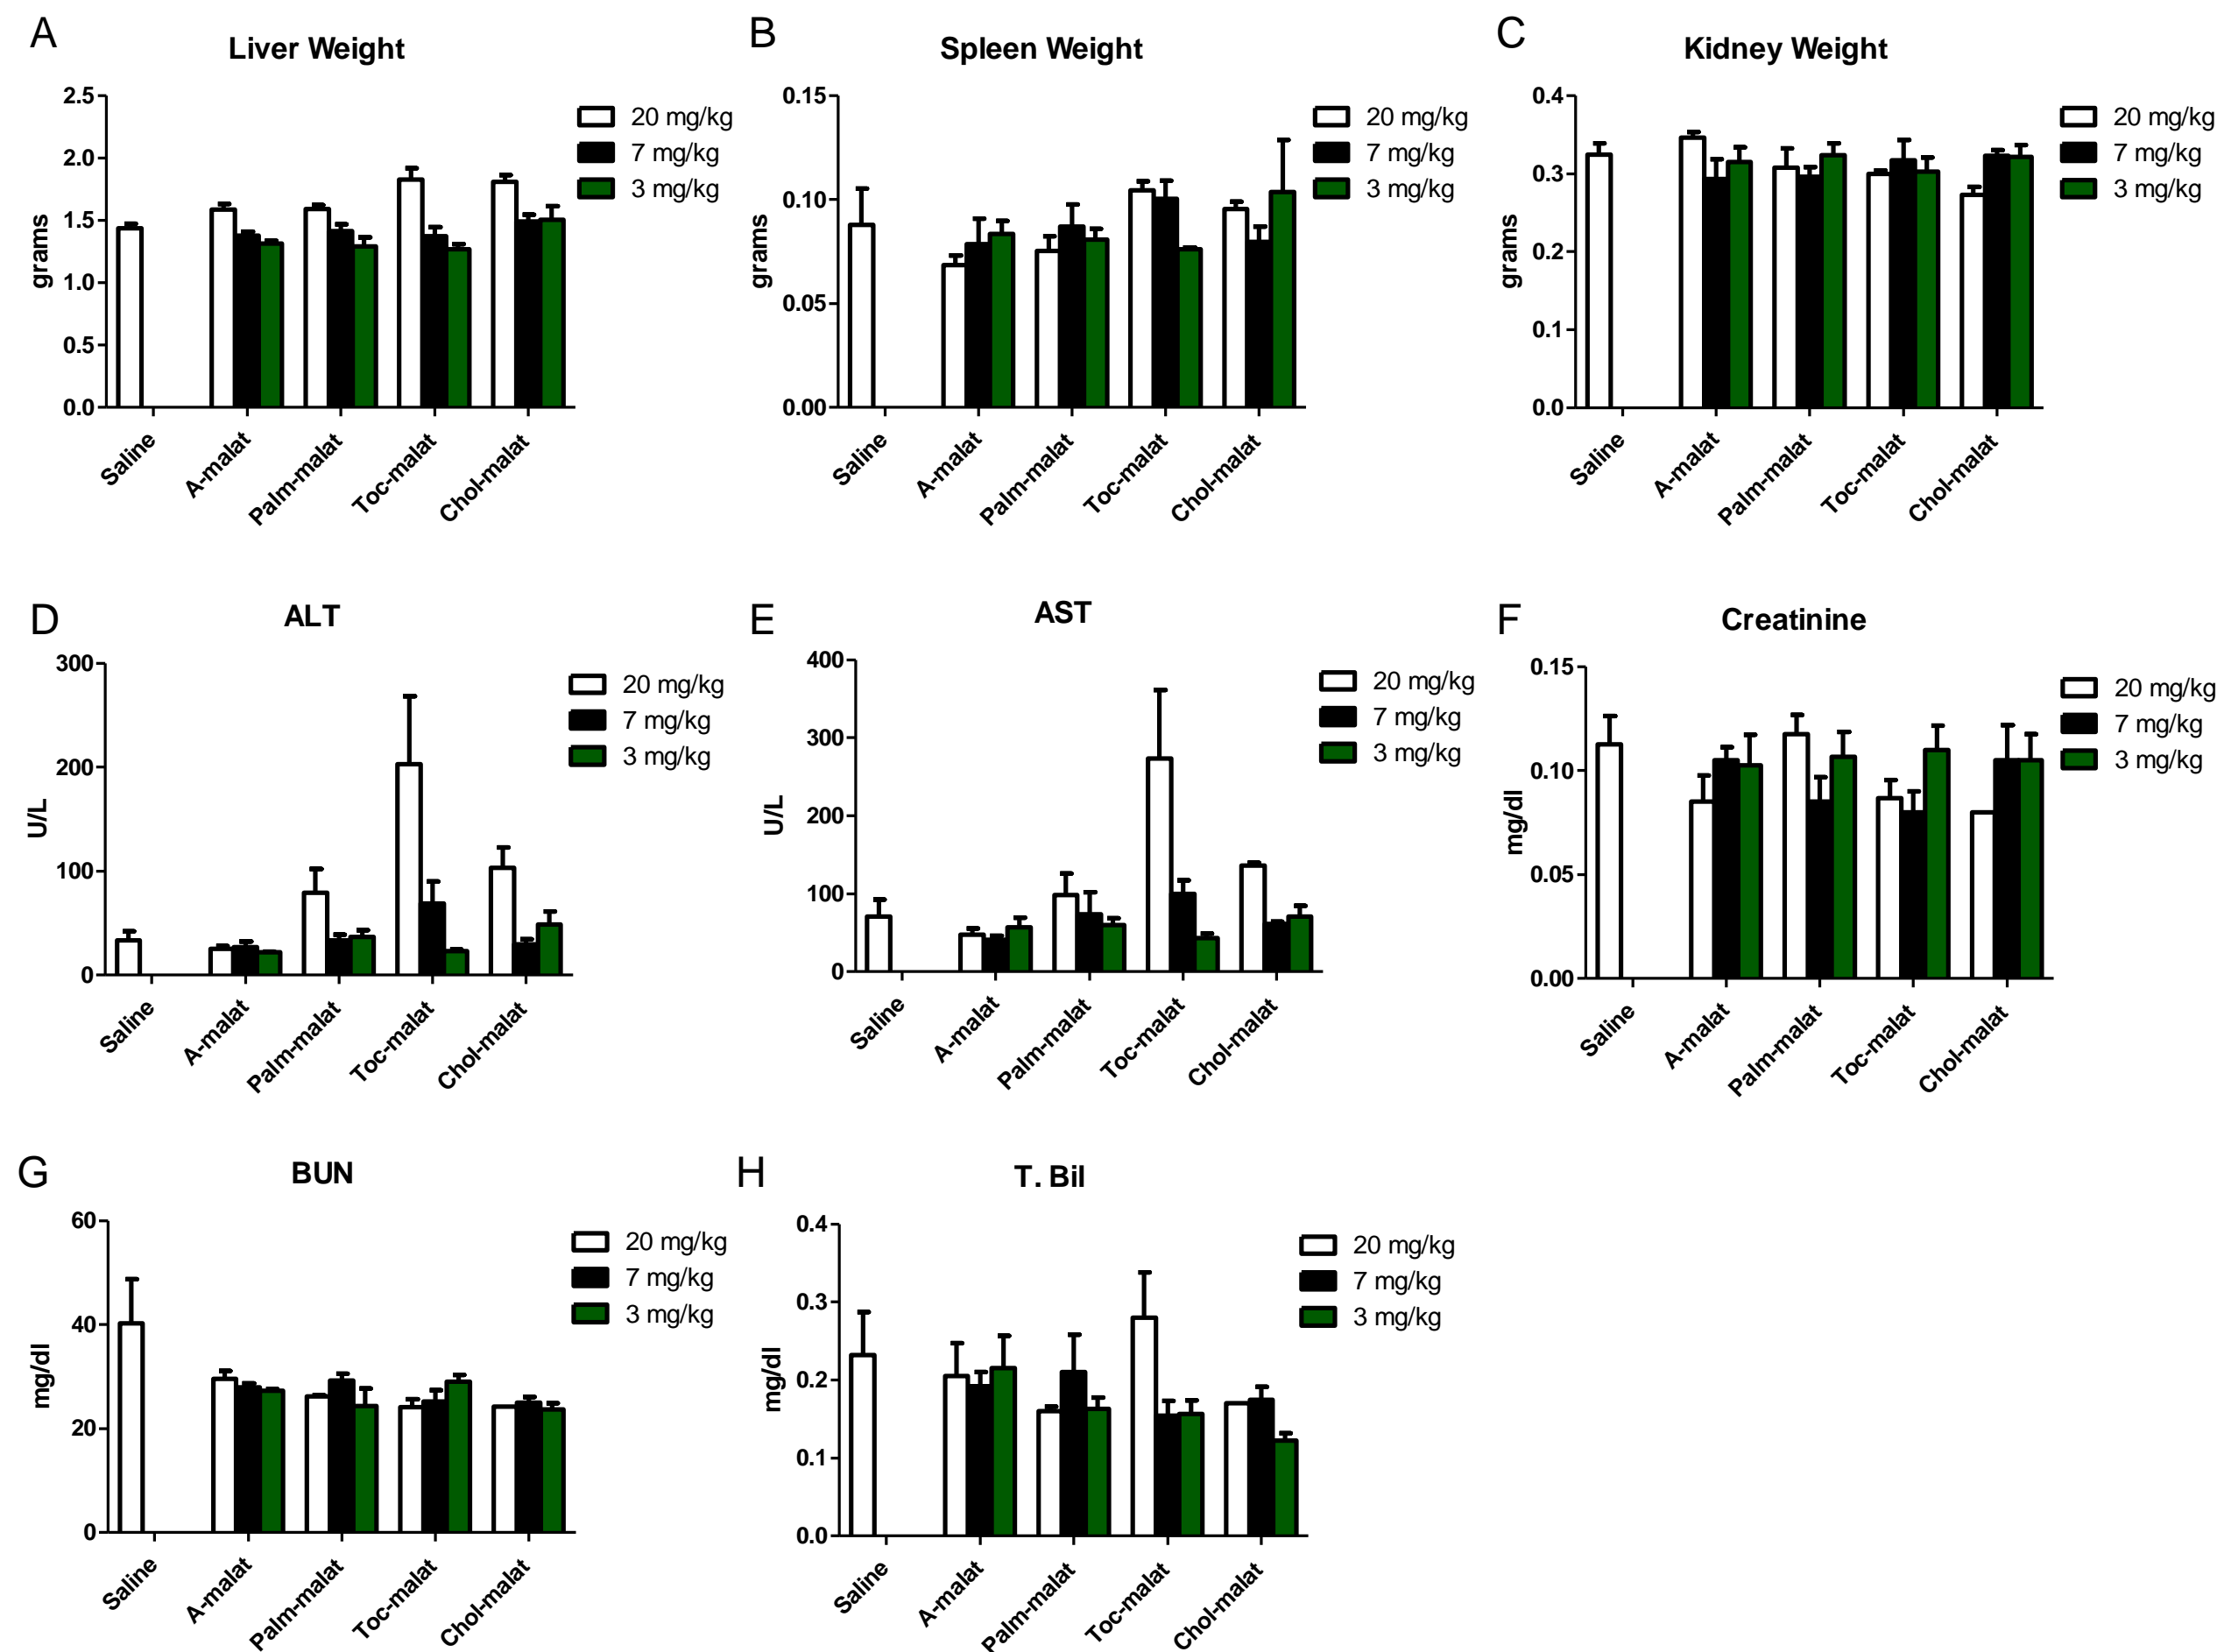

**Supplementary Figure S2.** Treatment of mice with ASOs A-malat, Palm-malat, Toc-malat and Chol-malat were well tolerated in mice. Mice (C57BL/6, n=4/group) were injected intravenously once weekly for two weeks with 3, 10 or 20 mg/kg of ASOs. Mice were sacrificed 48 hours after the last dose and organs were harvested and weighed. All ASOs were well tolerated and did not cause appreciable changes in (A) liver (B) spleen and (C) kidney weights (D) ALT (E) AST (F) creatinine (G) Blood urea nitrogen and (H) Bilirubin. All errors are  $\pm$ std.dev.

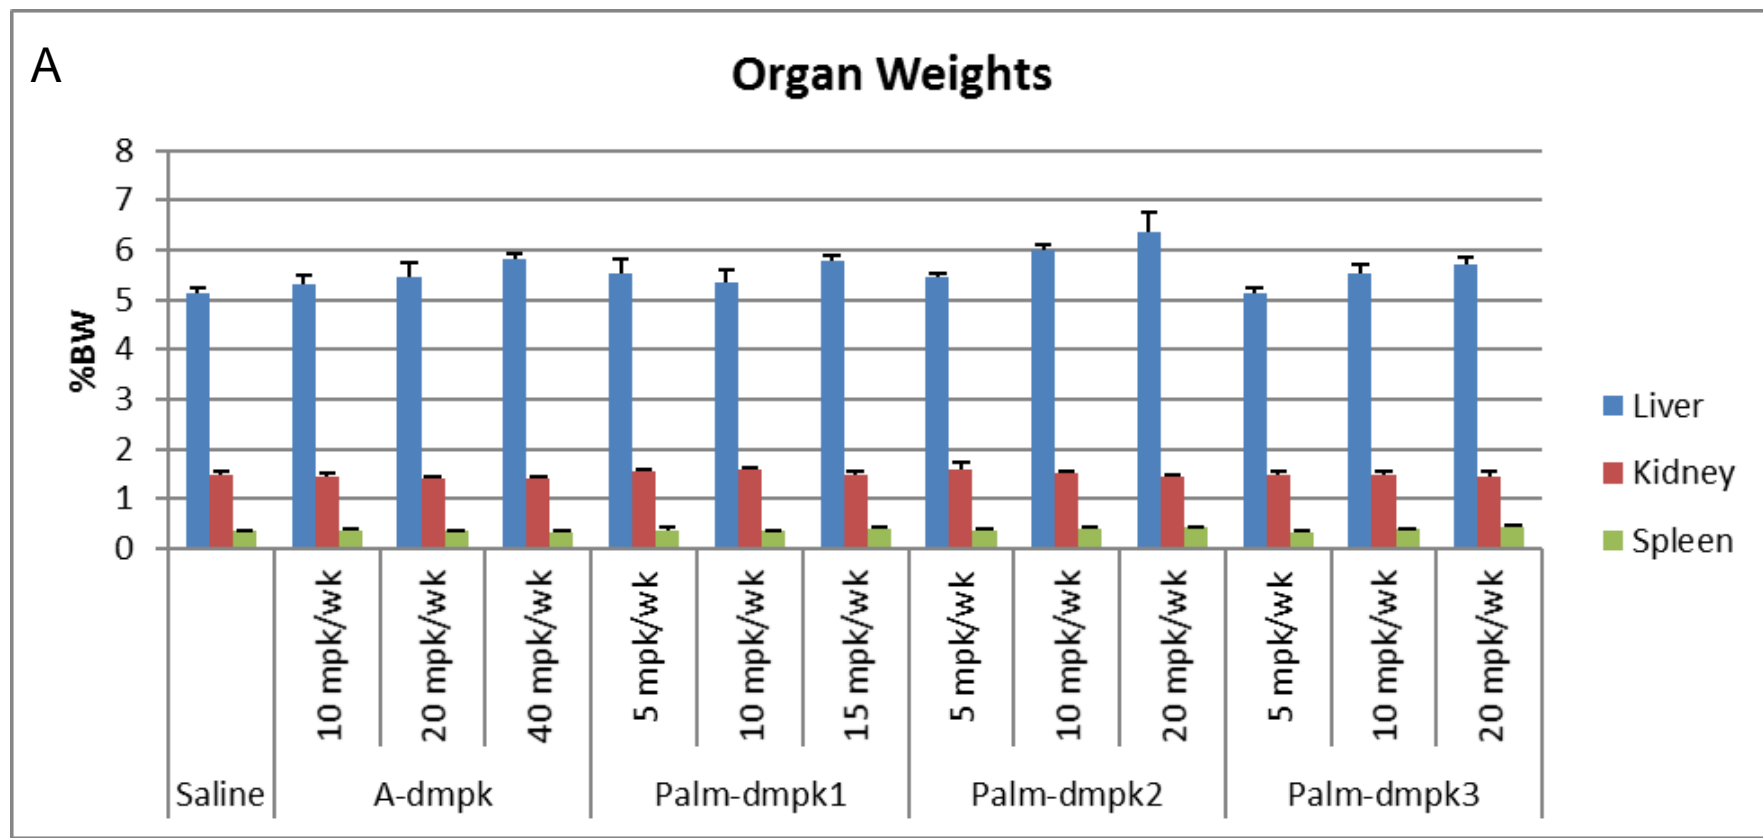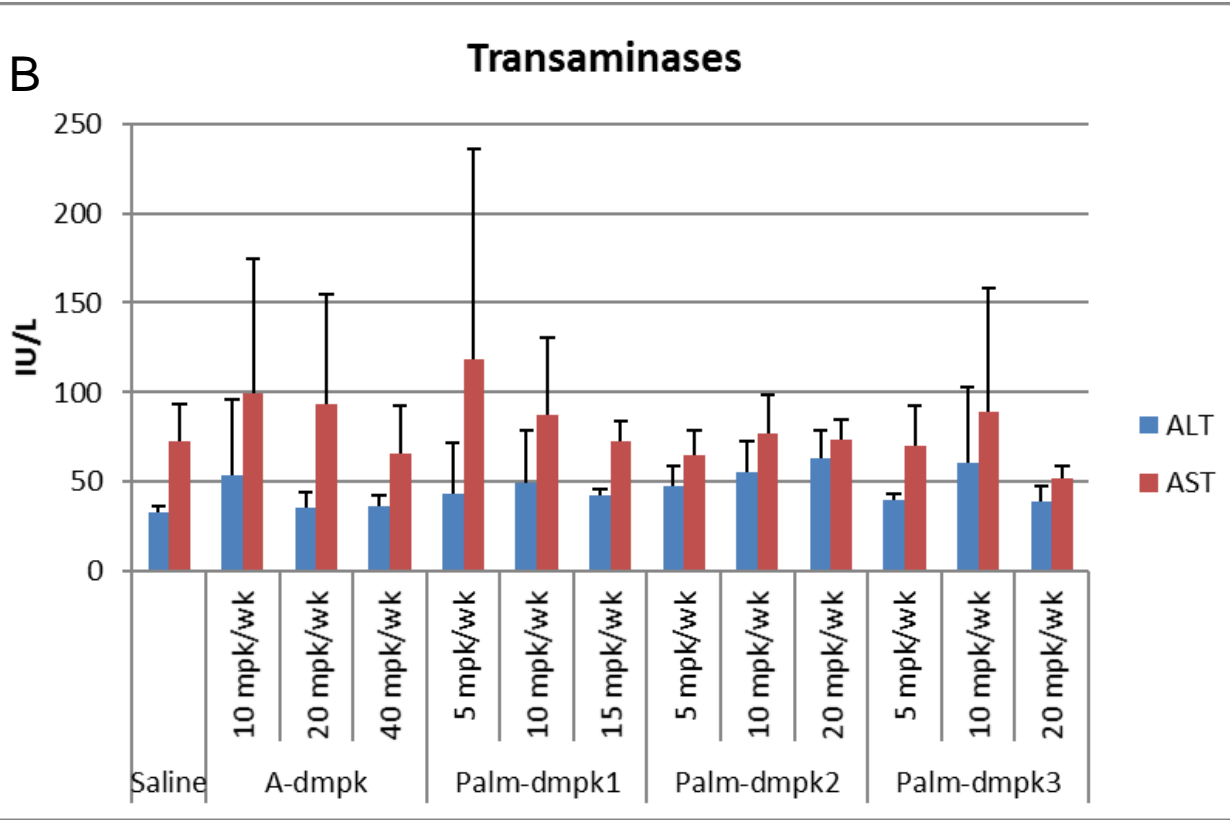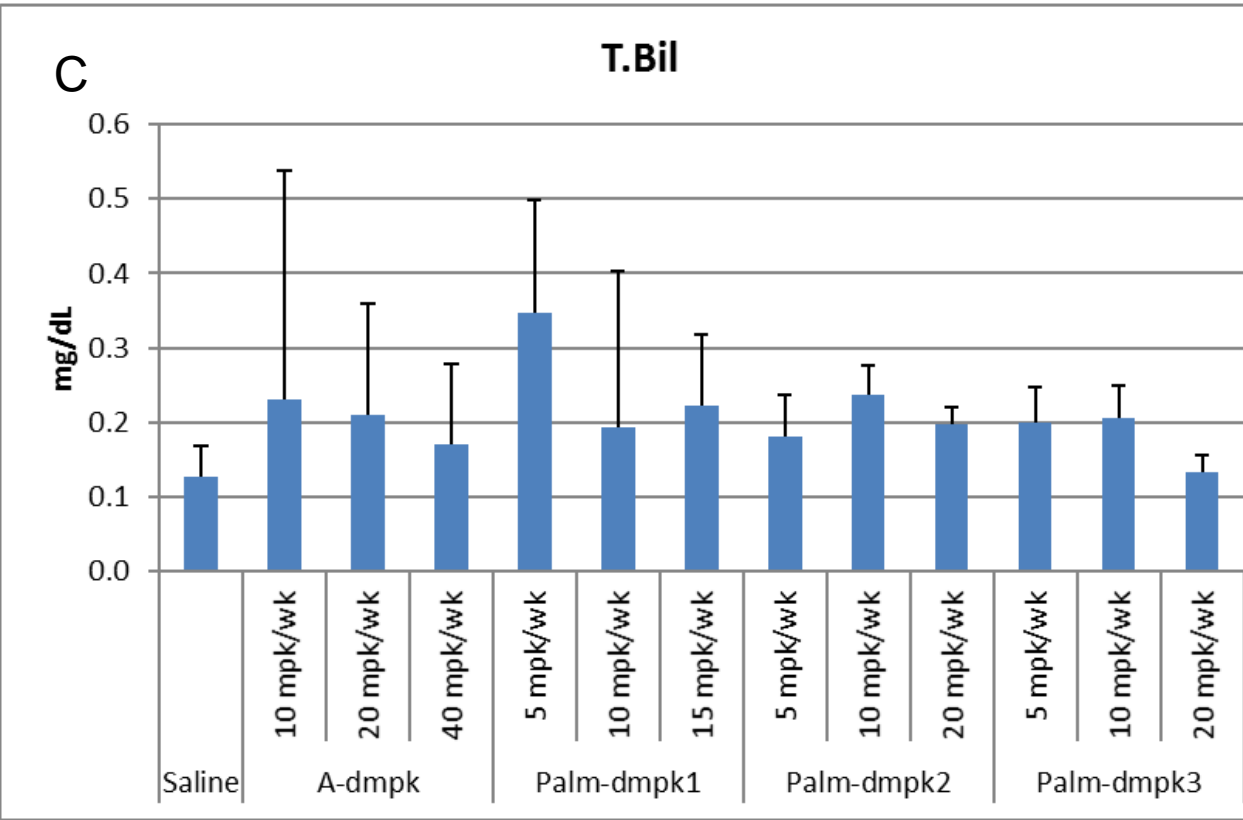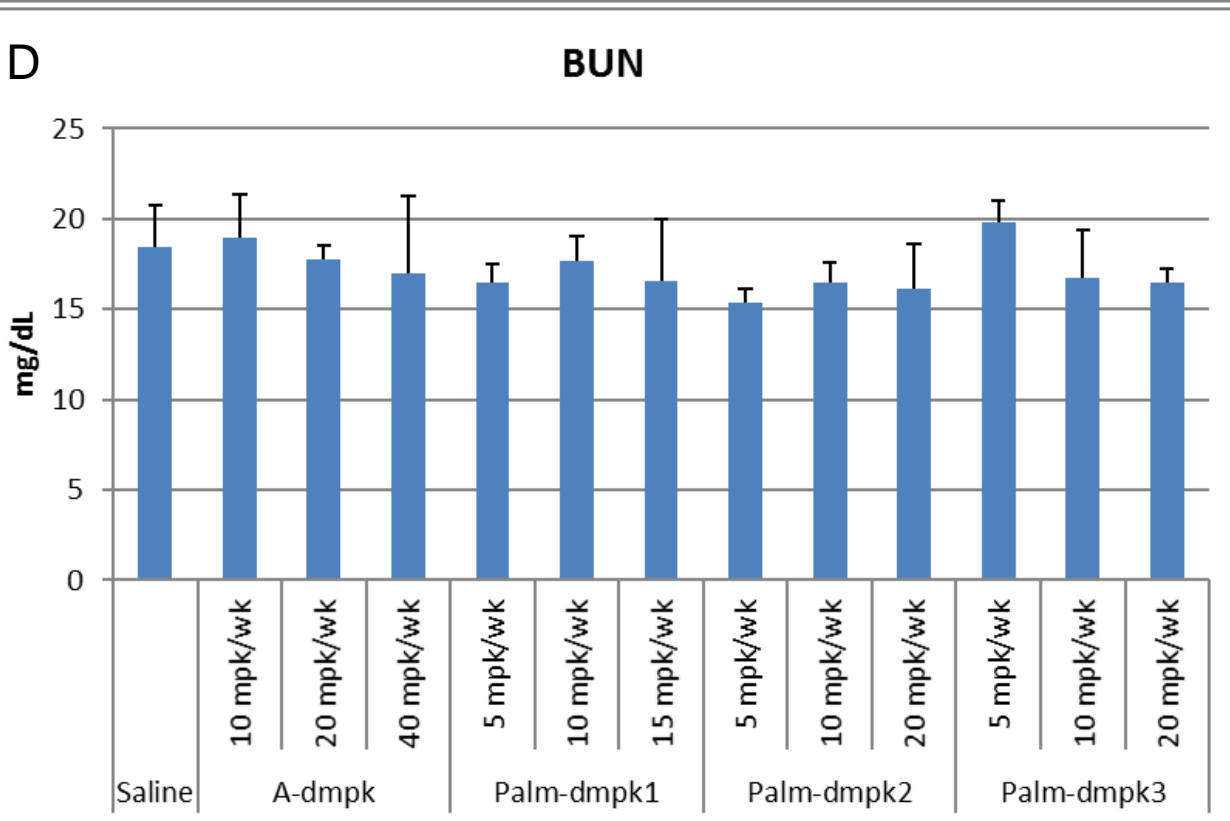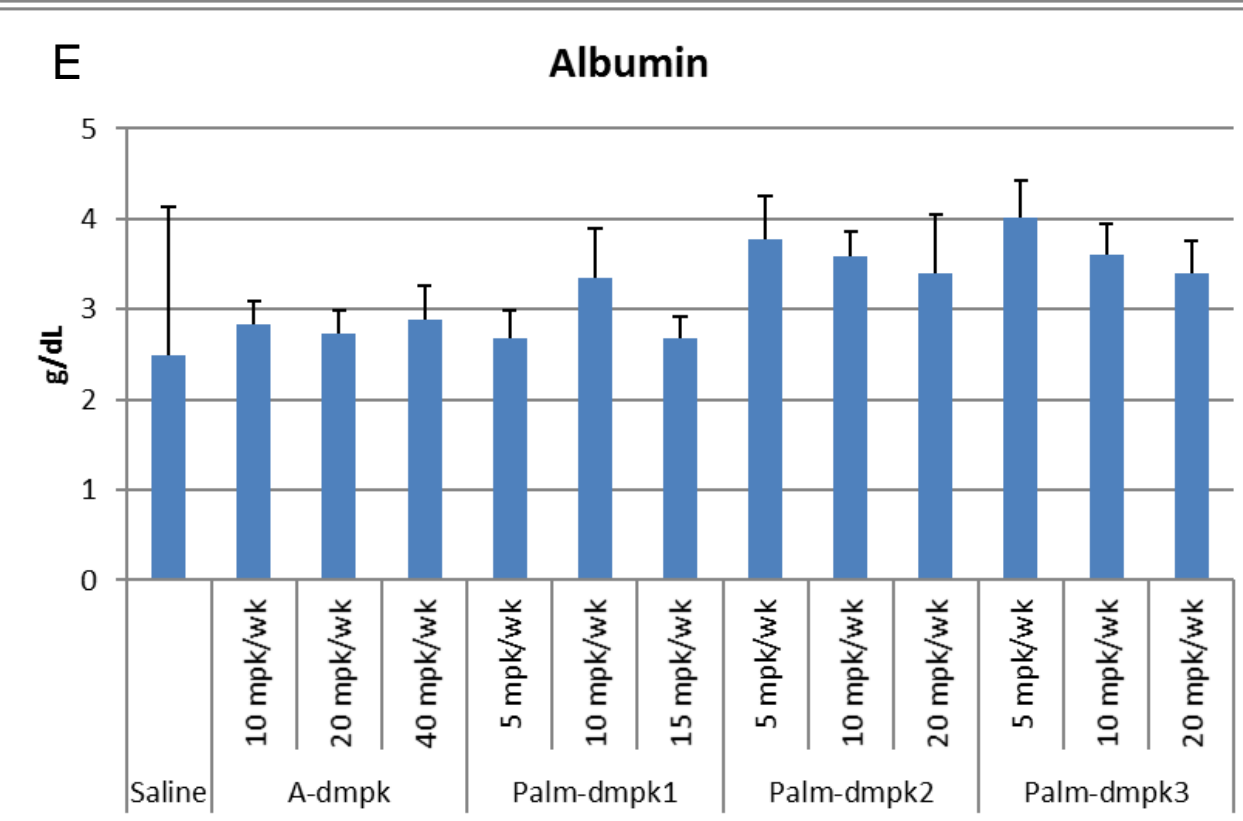

**Supplementary Figure S3.** Palmitate conjugated ASOs targeting DMPK mRNA were well tolerated in mice. Mice (Balb-c, n=4/group) were injected subcutaneously once weekly for 4 weeks with 10, 20 or 40 mg/kg of ASO. Mice were sacrificed 48 hours after the last ASO dose and organs were harvested and weighed. All ASOs were well tolerated and did not cause appreciable changes in (A) organ weights (B) ALT or AST (C) Bilirubin (D) Blood urea nitrogen (BUN) or (E) Albumin. All errors are  $\pm$ std.dev.

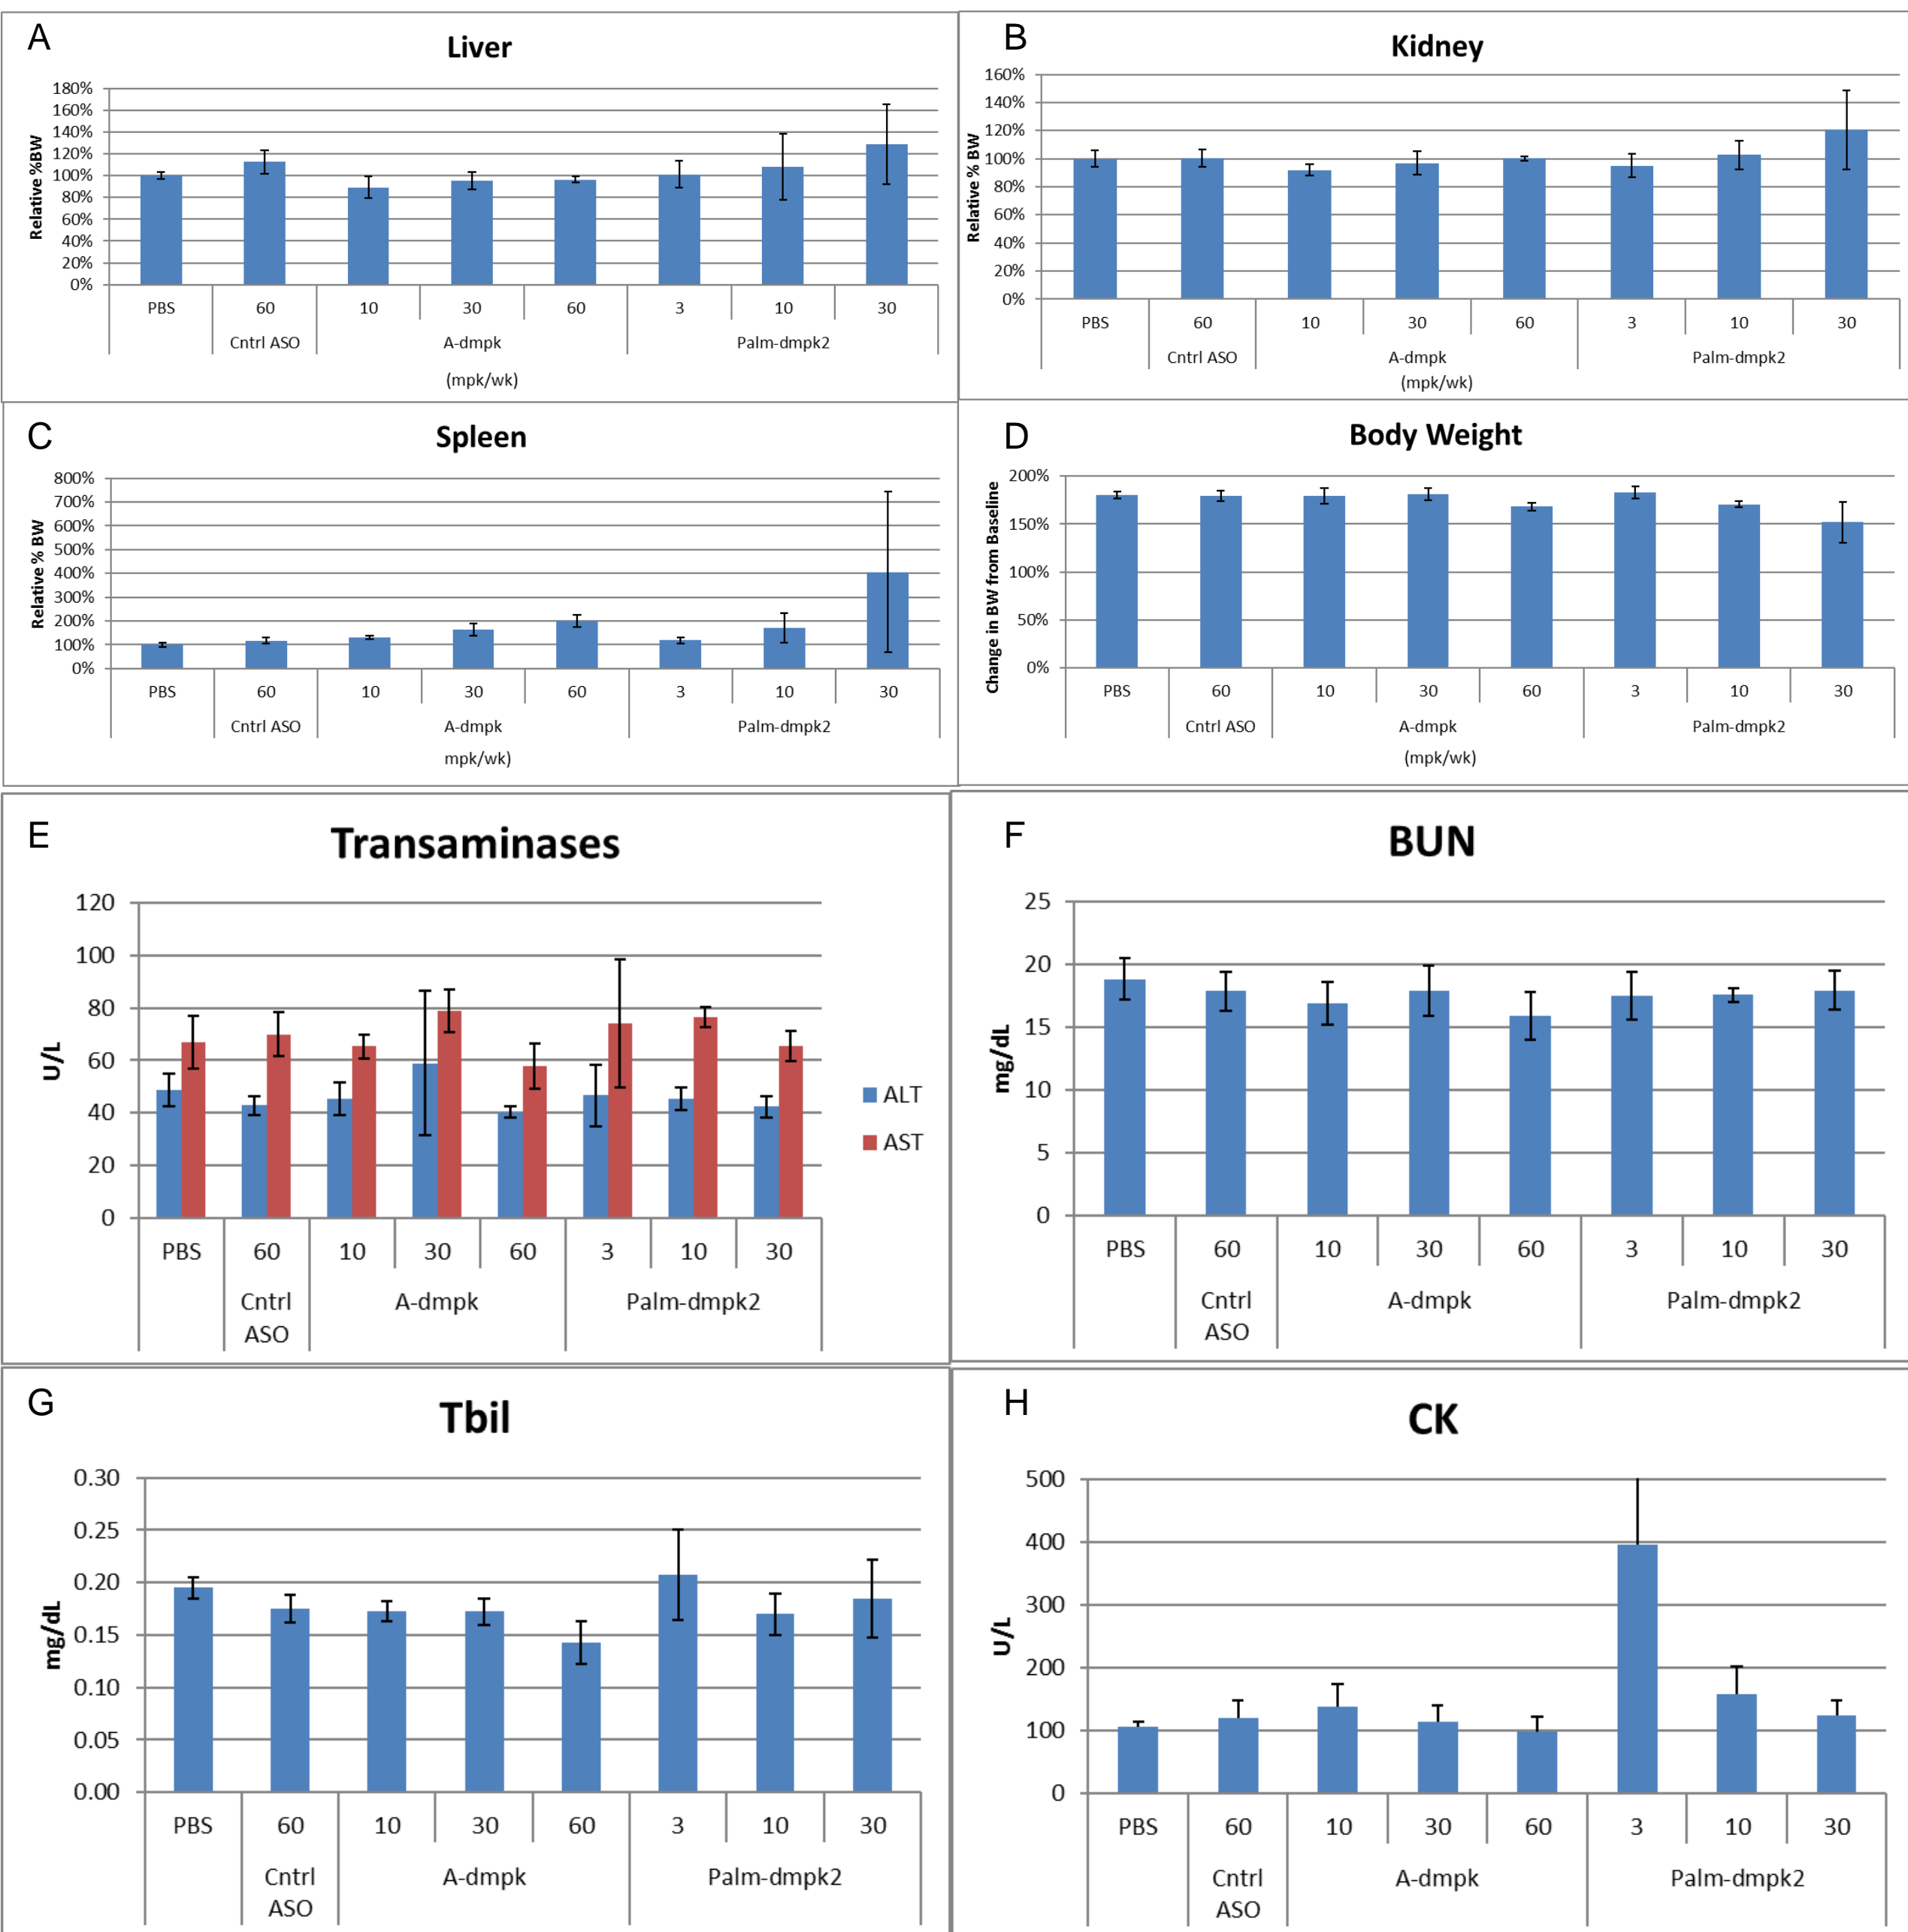

**Supplementary Figure S4.** Palmitate conjugated ASOs targeting DMPK mRNA were well tolerated in rats. Rats (SD, n=4/group) were injected subcutaneously once weekly for 3 weeks with 10, 30 or 60 mg/kg of ASO. Mice were sacrificed 48 hours after the last ASO dose and organs were harvested and weighed. All ASOs were well tolerated and did not cause appreciable changes in (A) liver (B) kidney (C) spleen (D) body weights (E) ALT or AST (F) Blood urea nitrogen (BUN) (G) Bilirubin (H) Creatinine kinase. All errors are  $\pm$ std.dev.

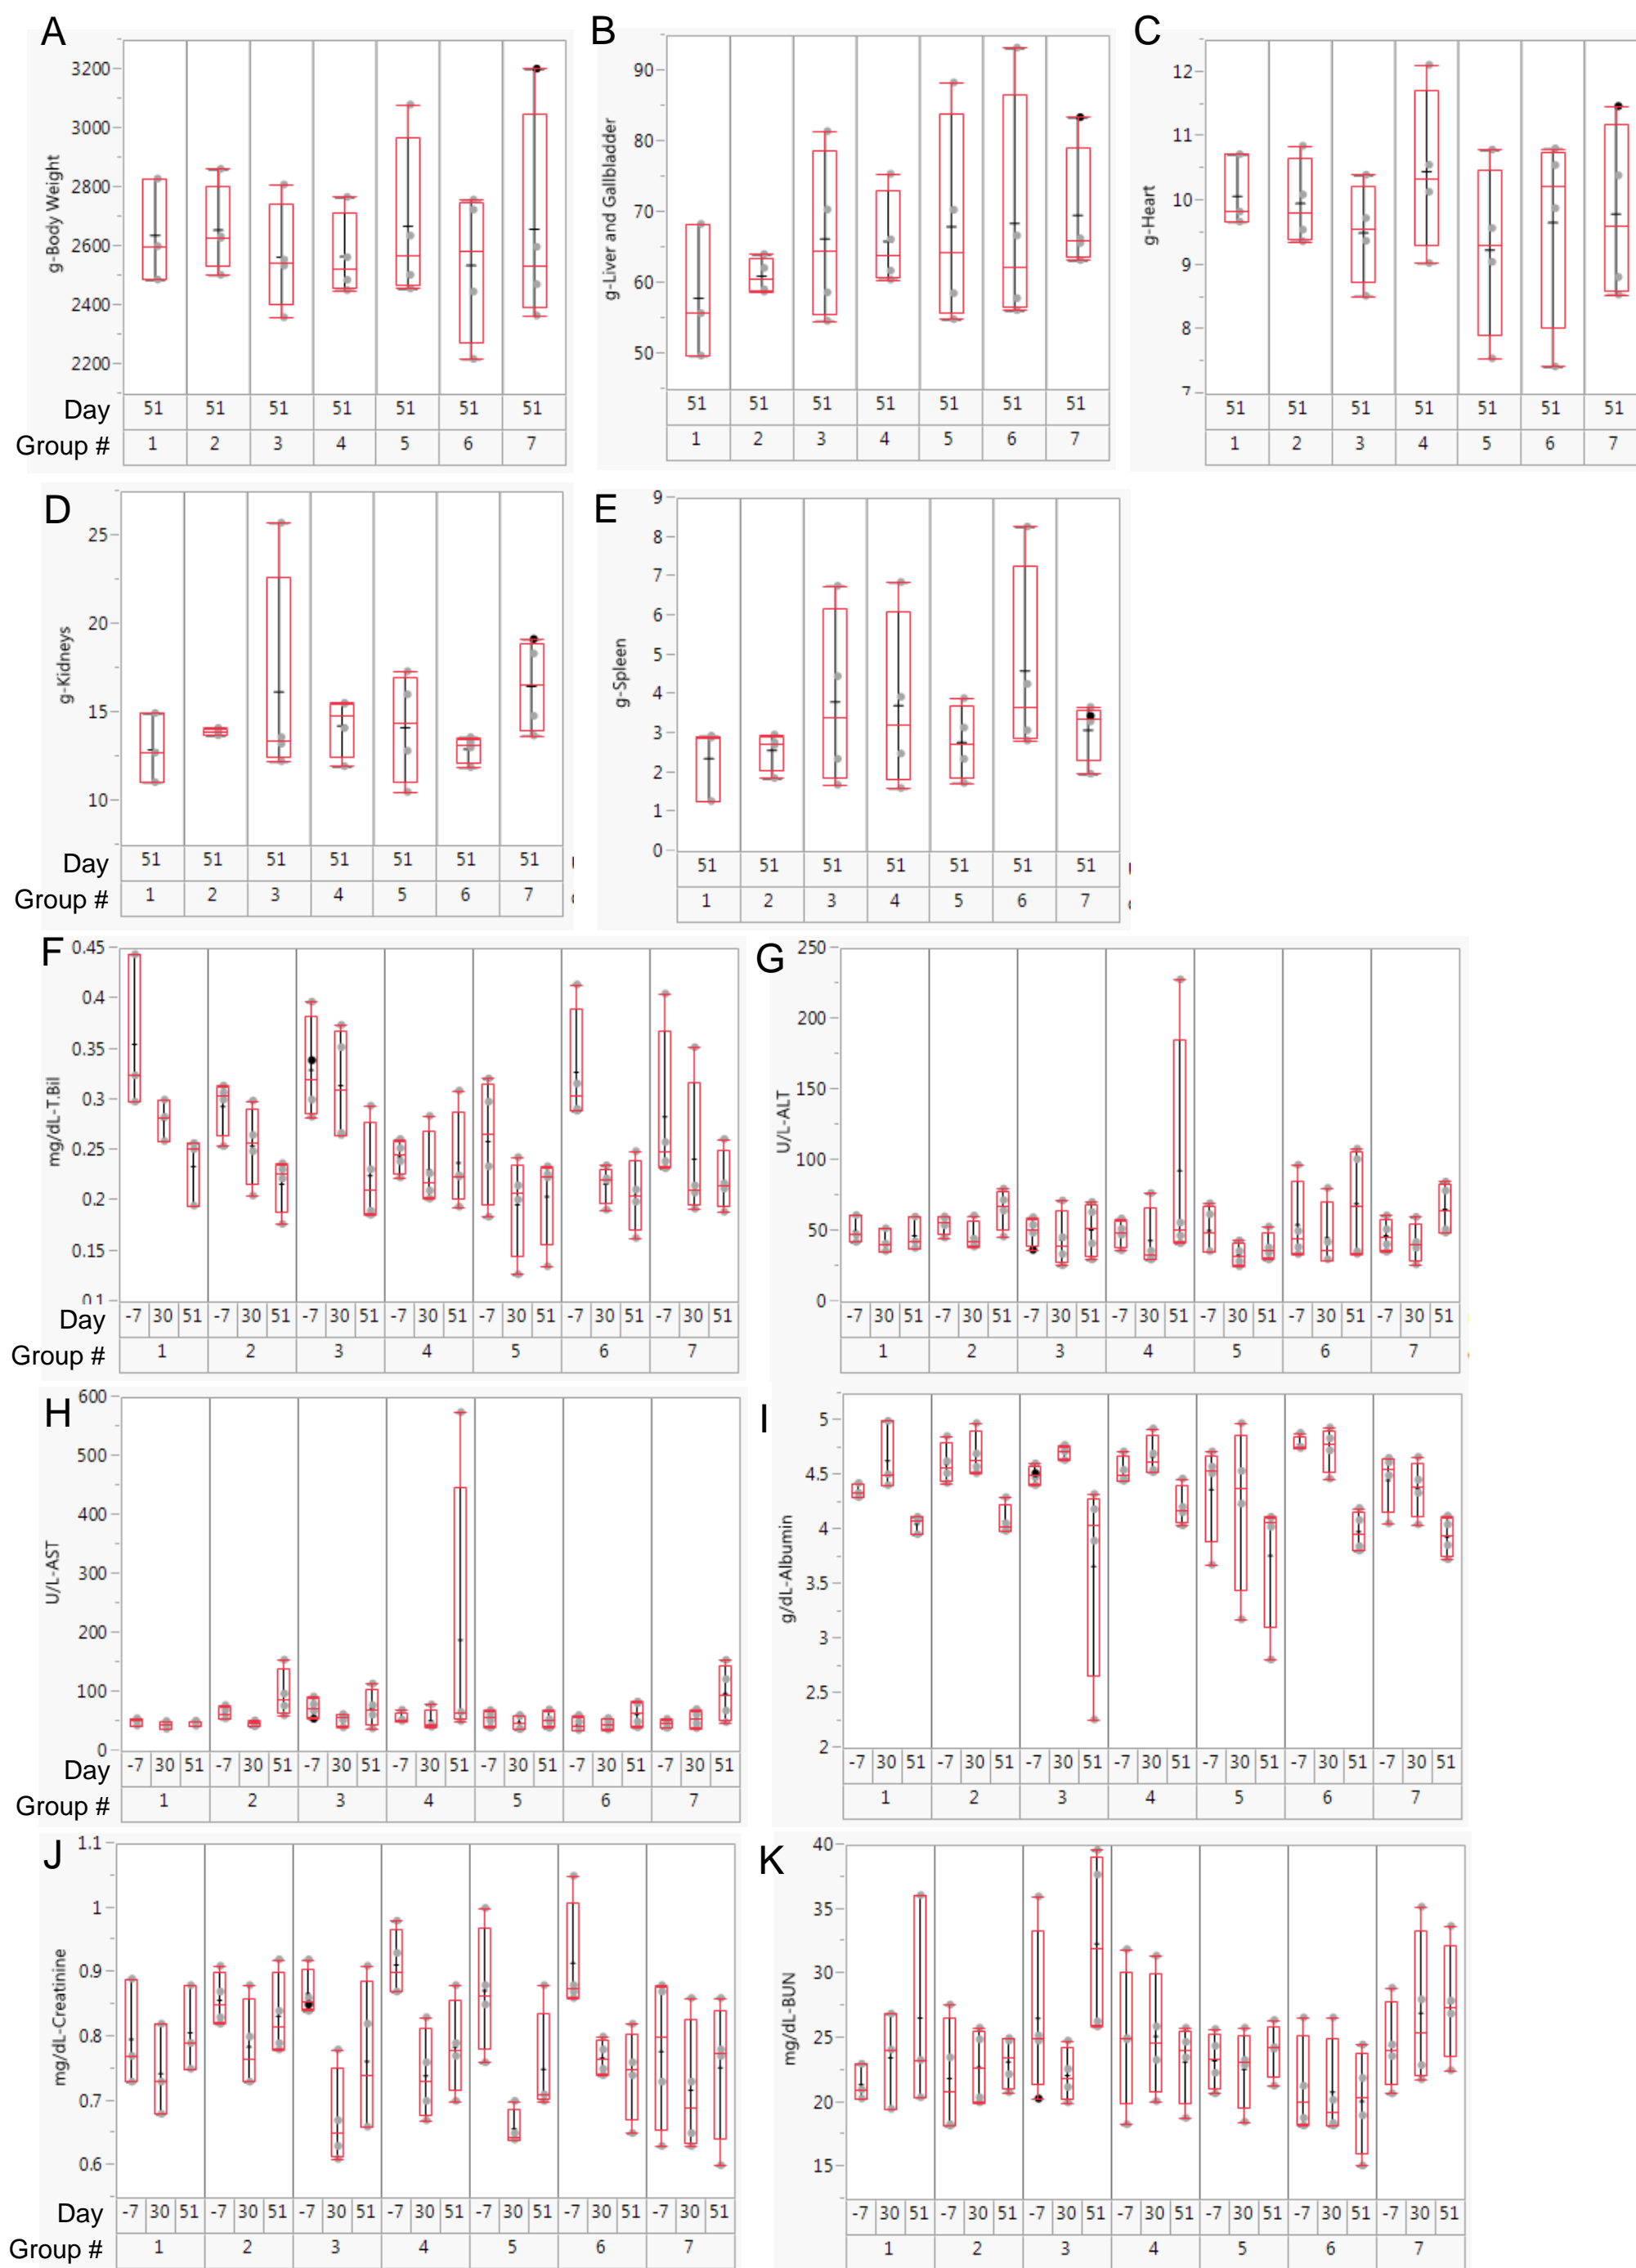

**Supplementary Figure S5.** Palmitate conjugated ASOs targeting DMPK mRNA were well tolerated in monkeys. Cynomolgus monkeys (n=4/group) were injected subcutaneously with 10 doses of A-dmpk or Palm-dmpk2 over 7 weeks. Monkeys were sacrificed 48 hours after the last ASO dose and organs were harvested and weighed. All ASOs were well tolerated and did not cause appreciable changes in (A) Body (B) liver (C) heart (D) kidney (E) spleen weights. ASO treatment did not cause appreciable changes in (F) Bilirubin (G) ALT (H) AST (I) Albumin (J) Creatinine and (K) Blood urea nitrogen as measured on days -7, 30 and 51. Groups 1 represents saline, Groups 2, 3, 4 represent animals treated with 10, 20 or 40 mg/kg of A-dmpk, Groups 5, 6 and 7 represent animals treated with 10, 20 and 40 mg/kg of Palm-dmpk2. Each data point represents an animal.

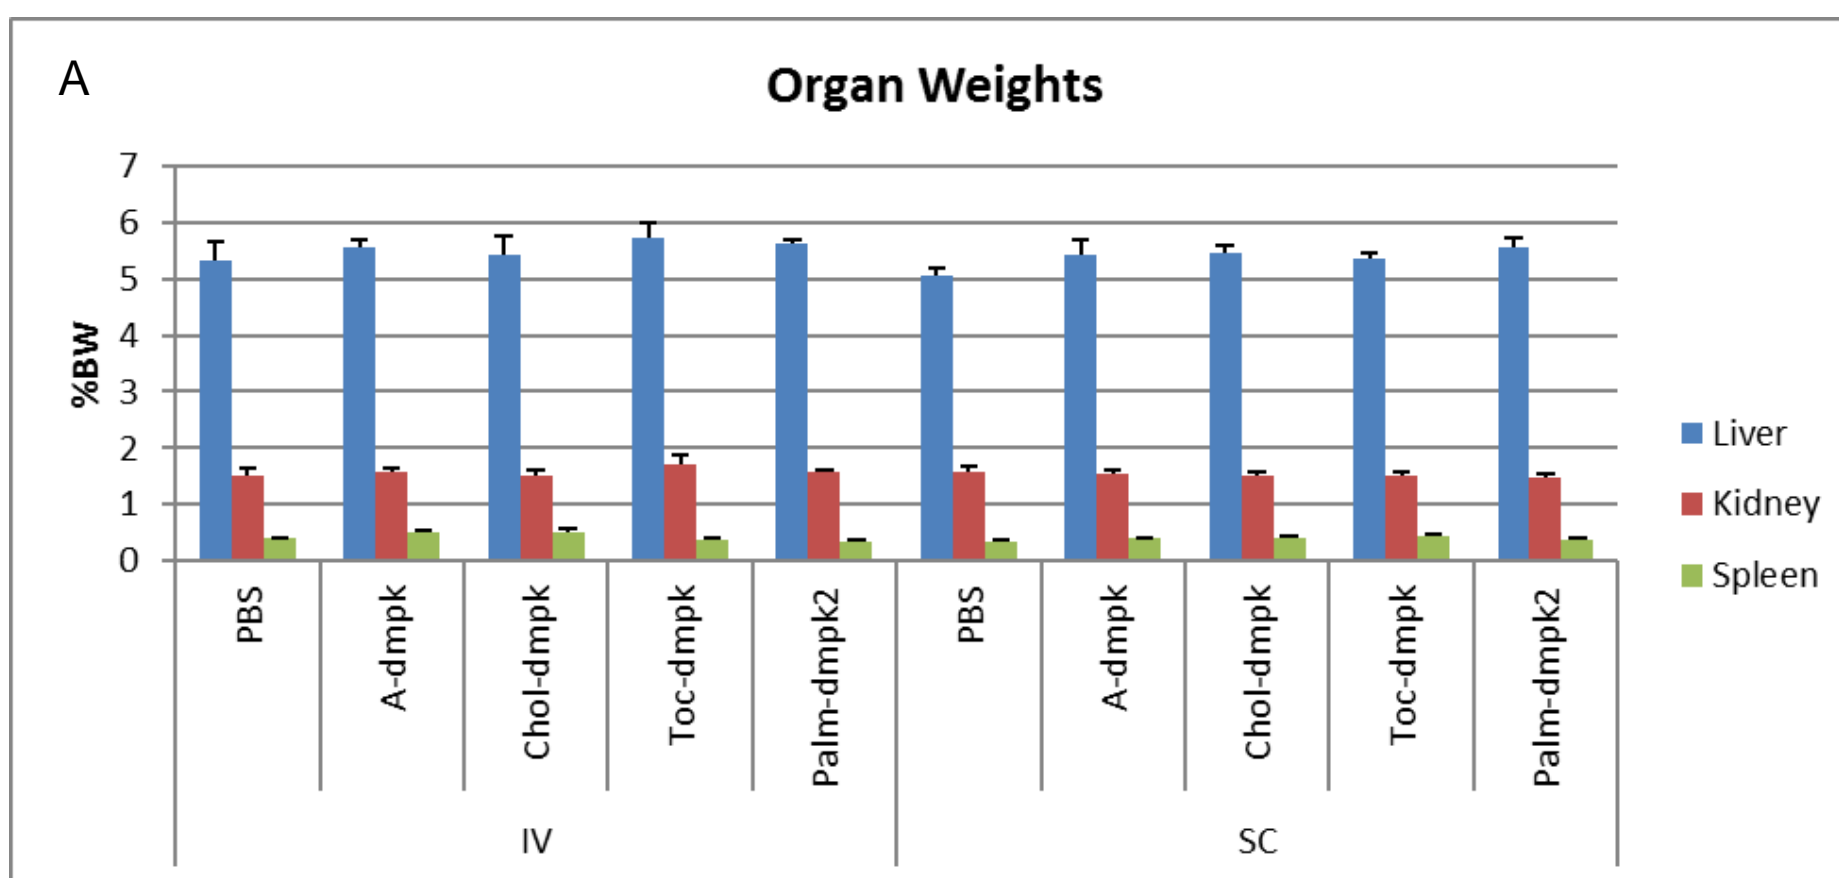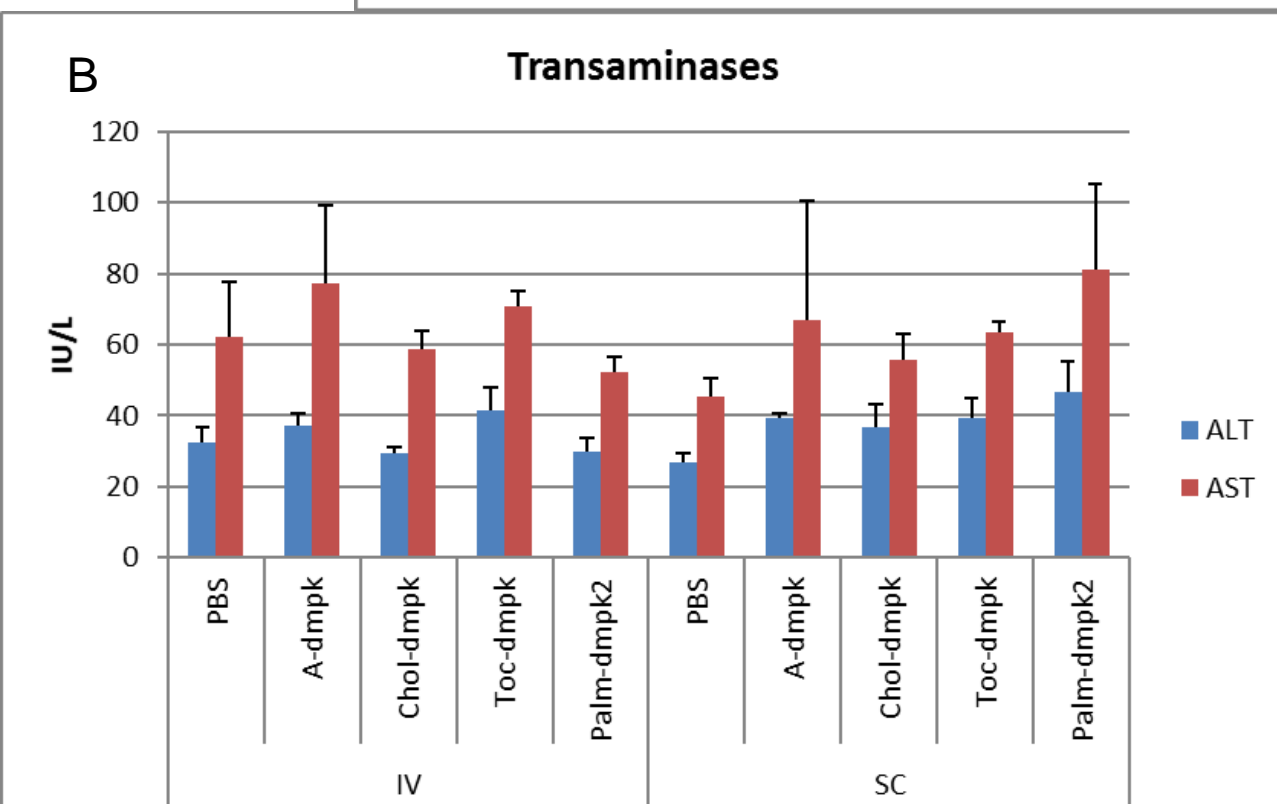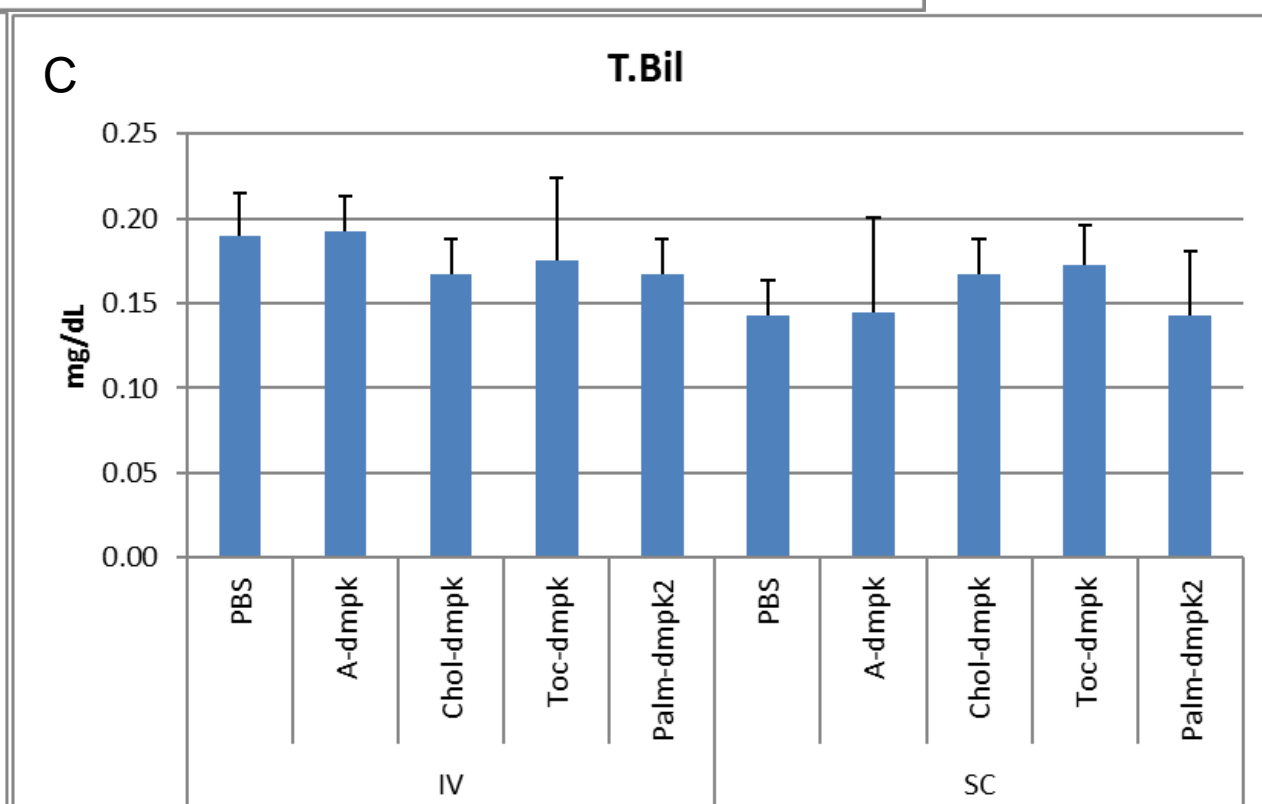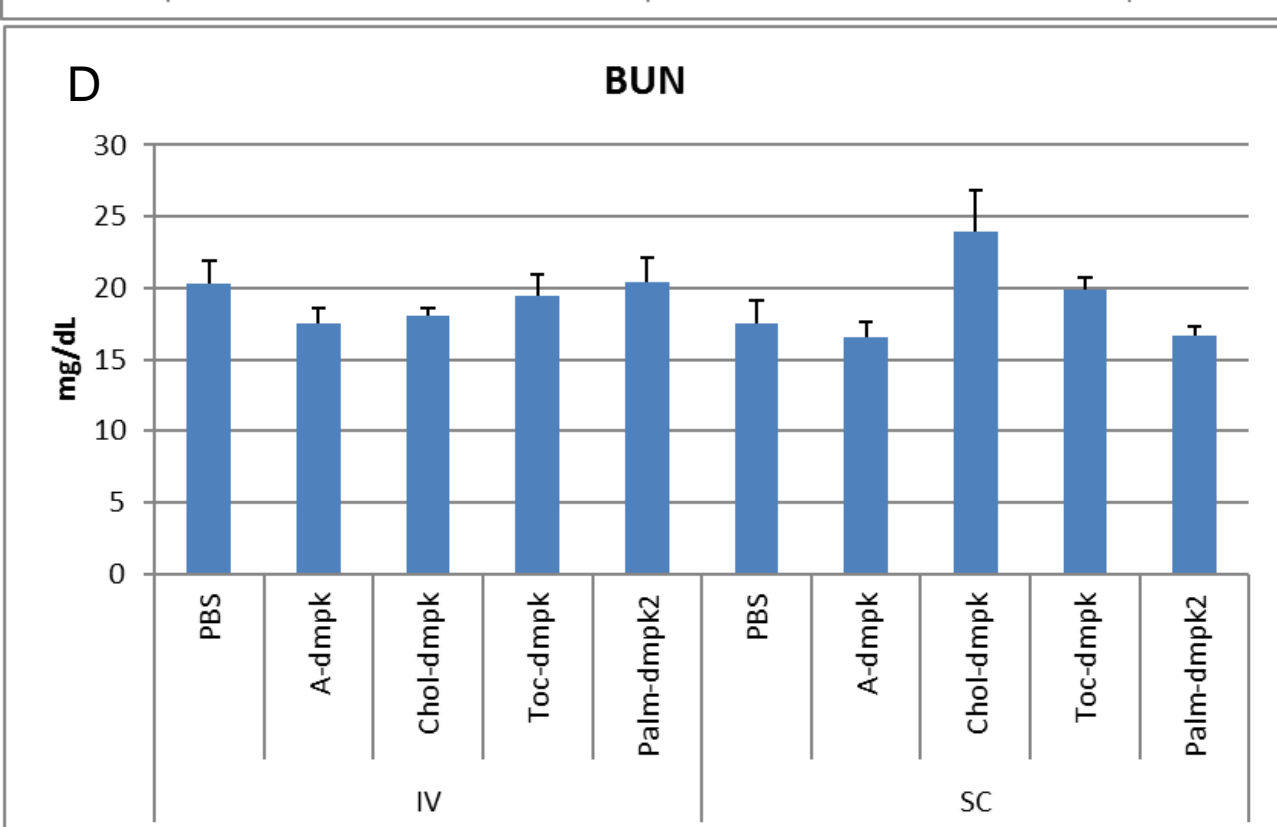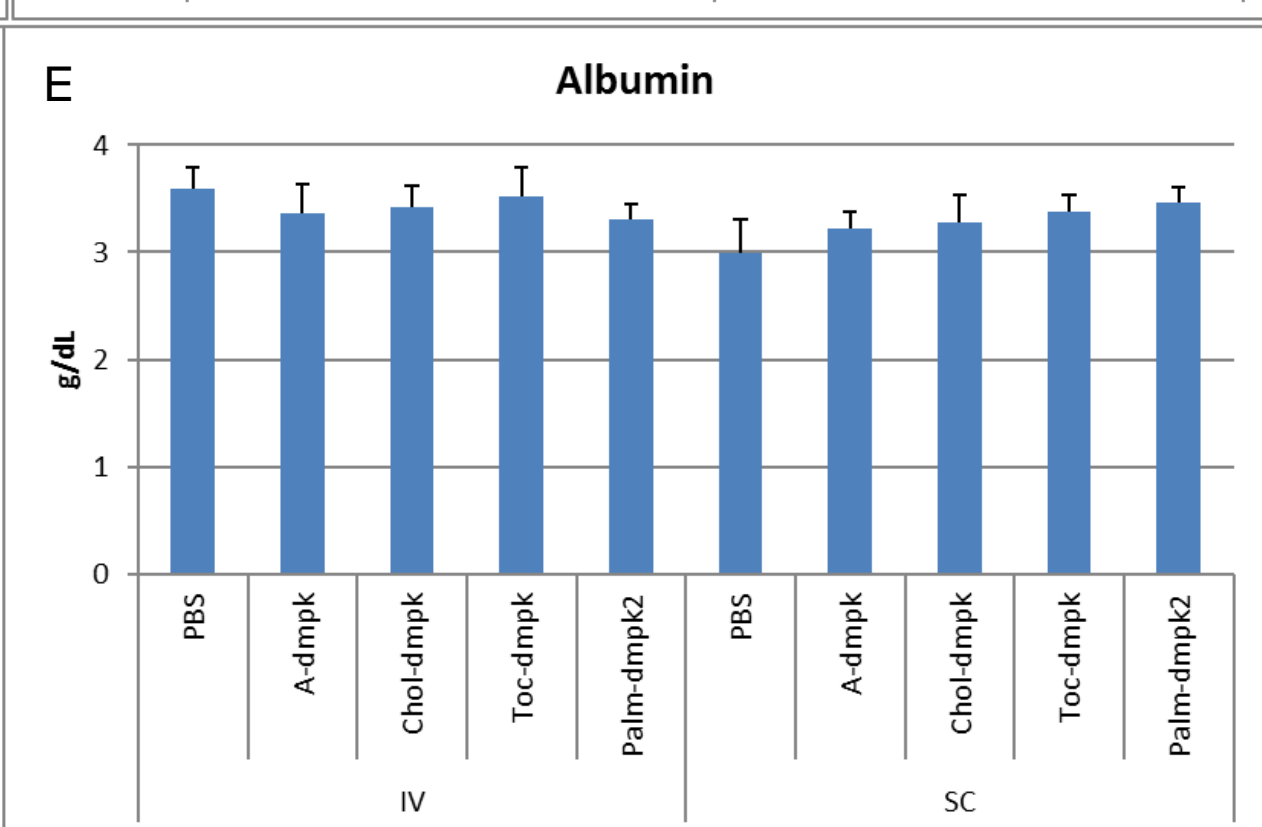

**Supplementary Figure S6.** Palmitate, tocopherol and cholesterol conjugated ASOs were well tolerated after subcutaneous or intravenous injections in mice. Mice (Balb-c, n=4/group) were injected once weekly for 4 weeks with 10 mg/kg of A-dmpk, Palm-dmpk2, Toc-dmpk or Chol-dmpk by subcutaneous or intravenous injections. Mice were sacrificed 48 hours after the last dose and organs were harvested and weighed. All ASOs were well tolerated and did not cause appreciable changes in (A) organ weights (B) ALT or AST (C) Bilirubin (D) Blood urea nitrogen (BUN) or (E) Albumin. All errors are  $\pm$ std.dev.



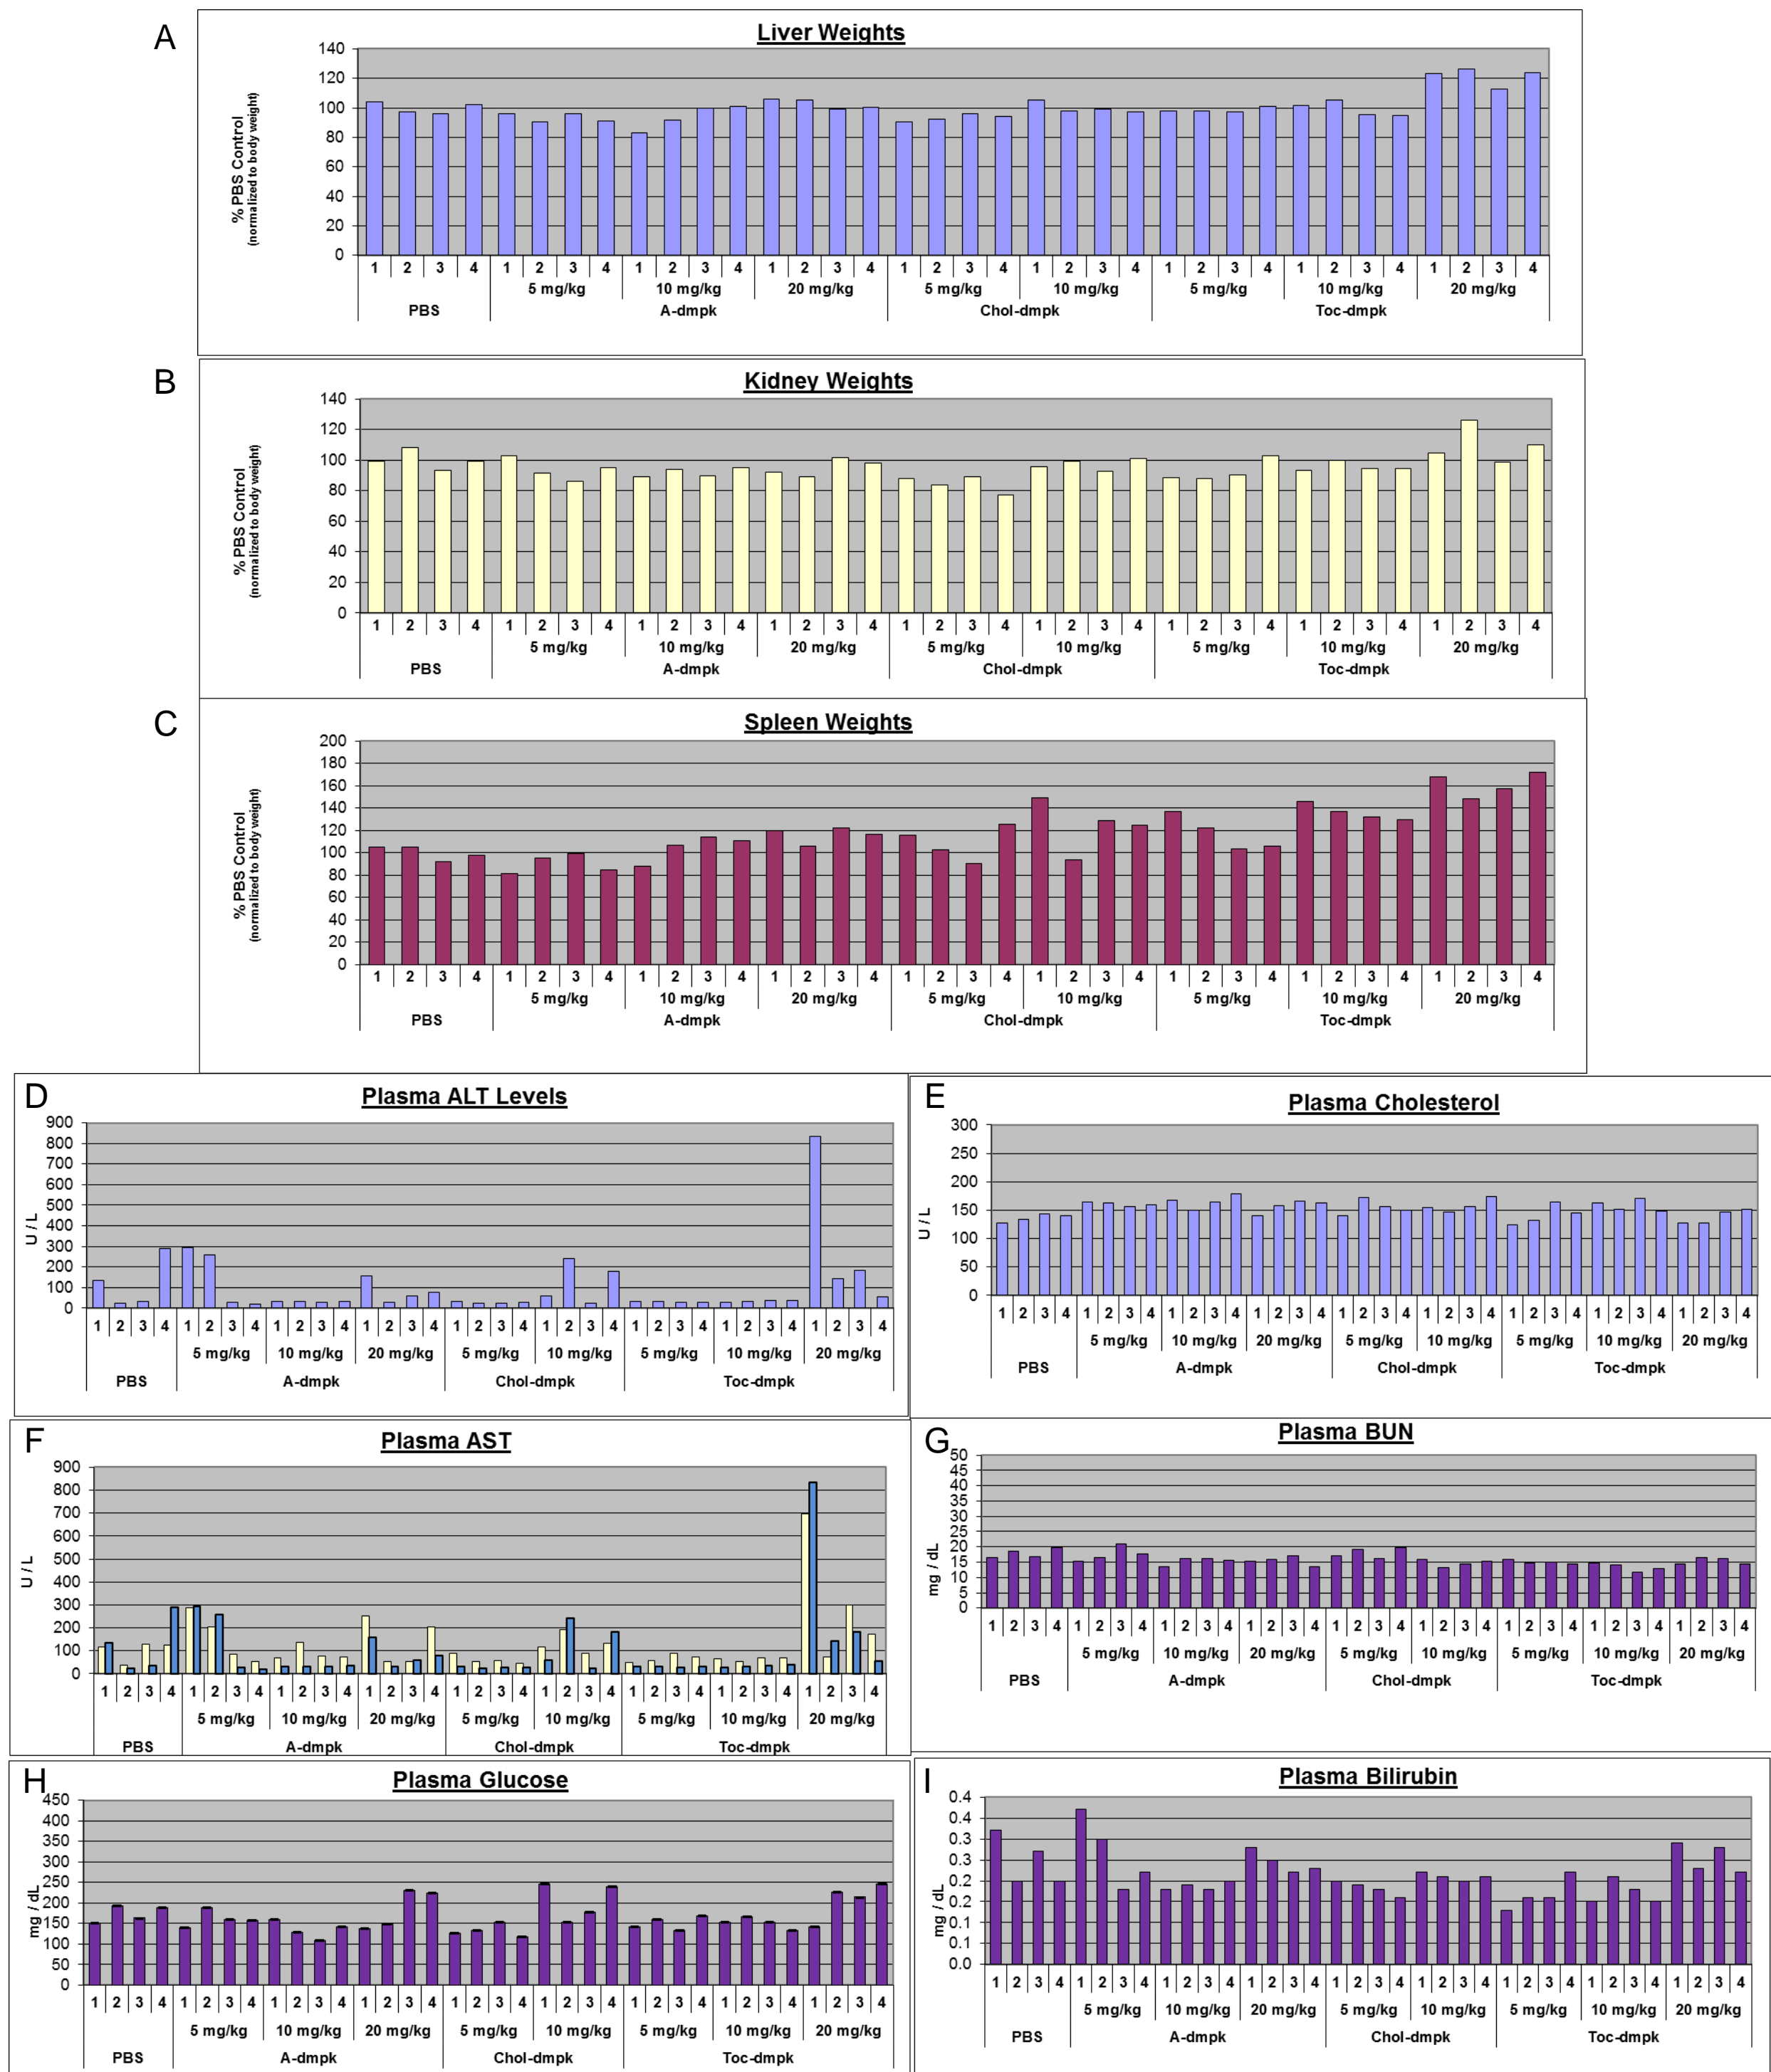

**Supplementary Figure S7.** Tocopherol conjugated ASO was well tolerated after multiple doses in mice but the cholesterol ASO was toxic at higher doses. Mice (Balb/c, n=4/group) were injected intravenously with 5, 10 or 20 mg/kg of A-dmpk, Chol-dmpk or Toc-dmpk once weekly for four weeks. All mice treated with Chol-dmpk died after one or two injections of 20 mg/kg ASO. Mice were sacrificed 48 hours after the last dose and organs were harvested and weighed. ASO treatment did not cause appreciable changes in (A) Liver (B) kidney (C) spleen weights (D) ALT (E) Cholesterol (F) AST (G) Blood urea nitrogen (H) glucose (I) bilirubin. Data from individual animals shown.



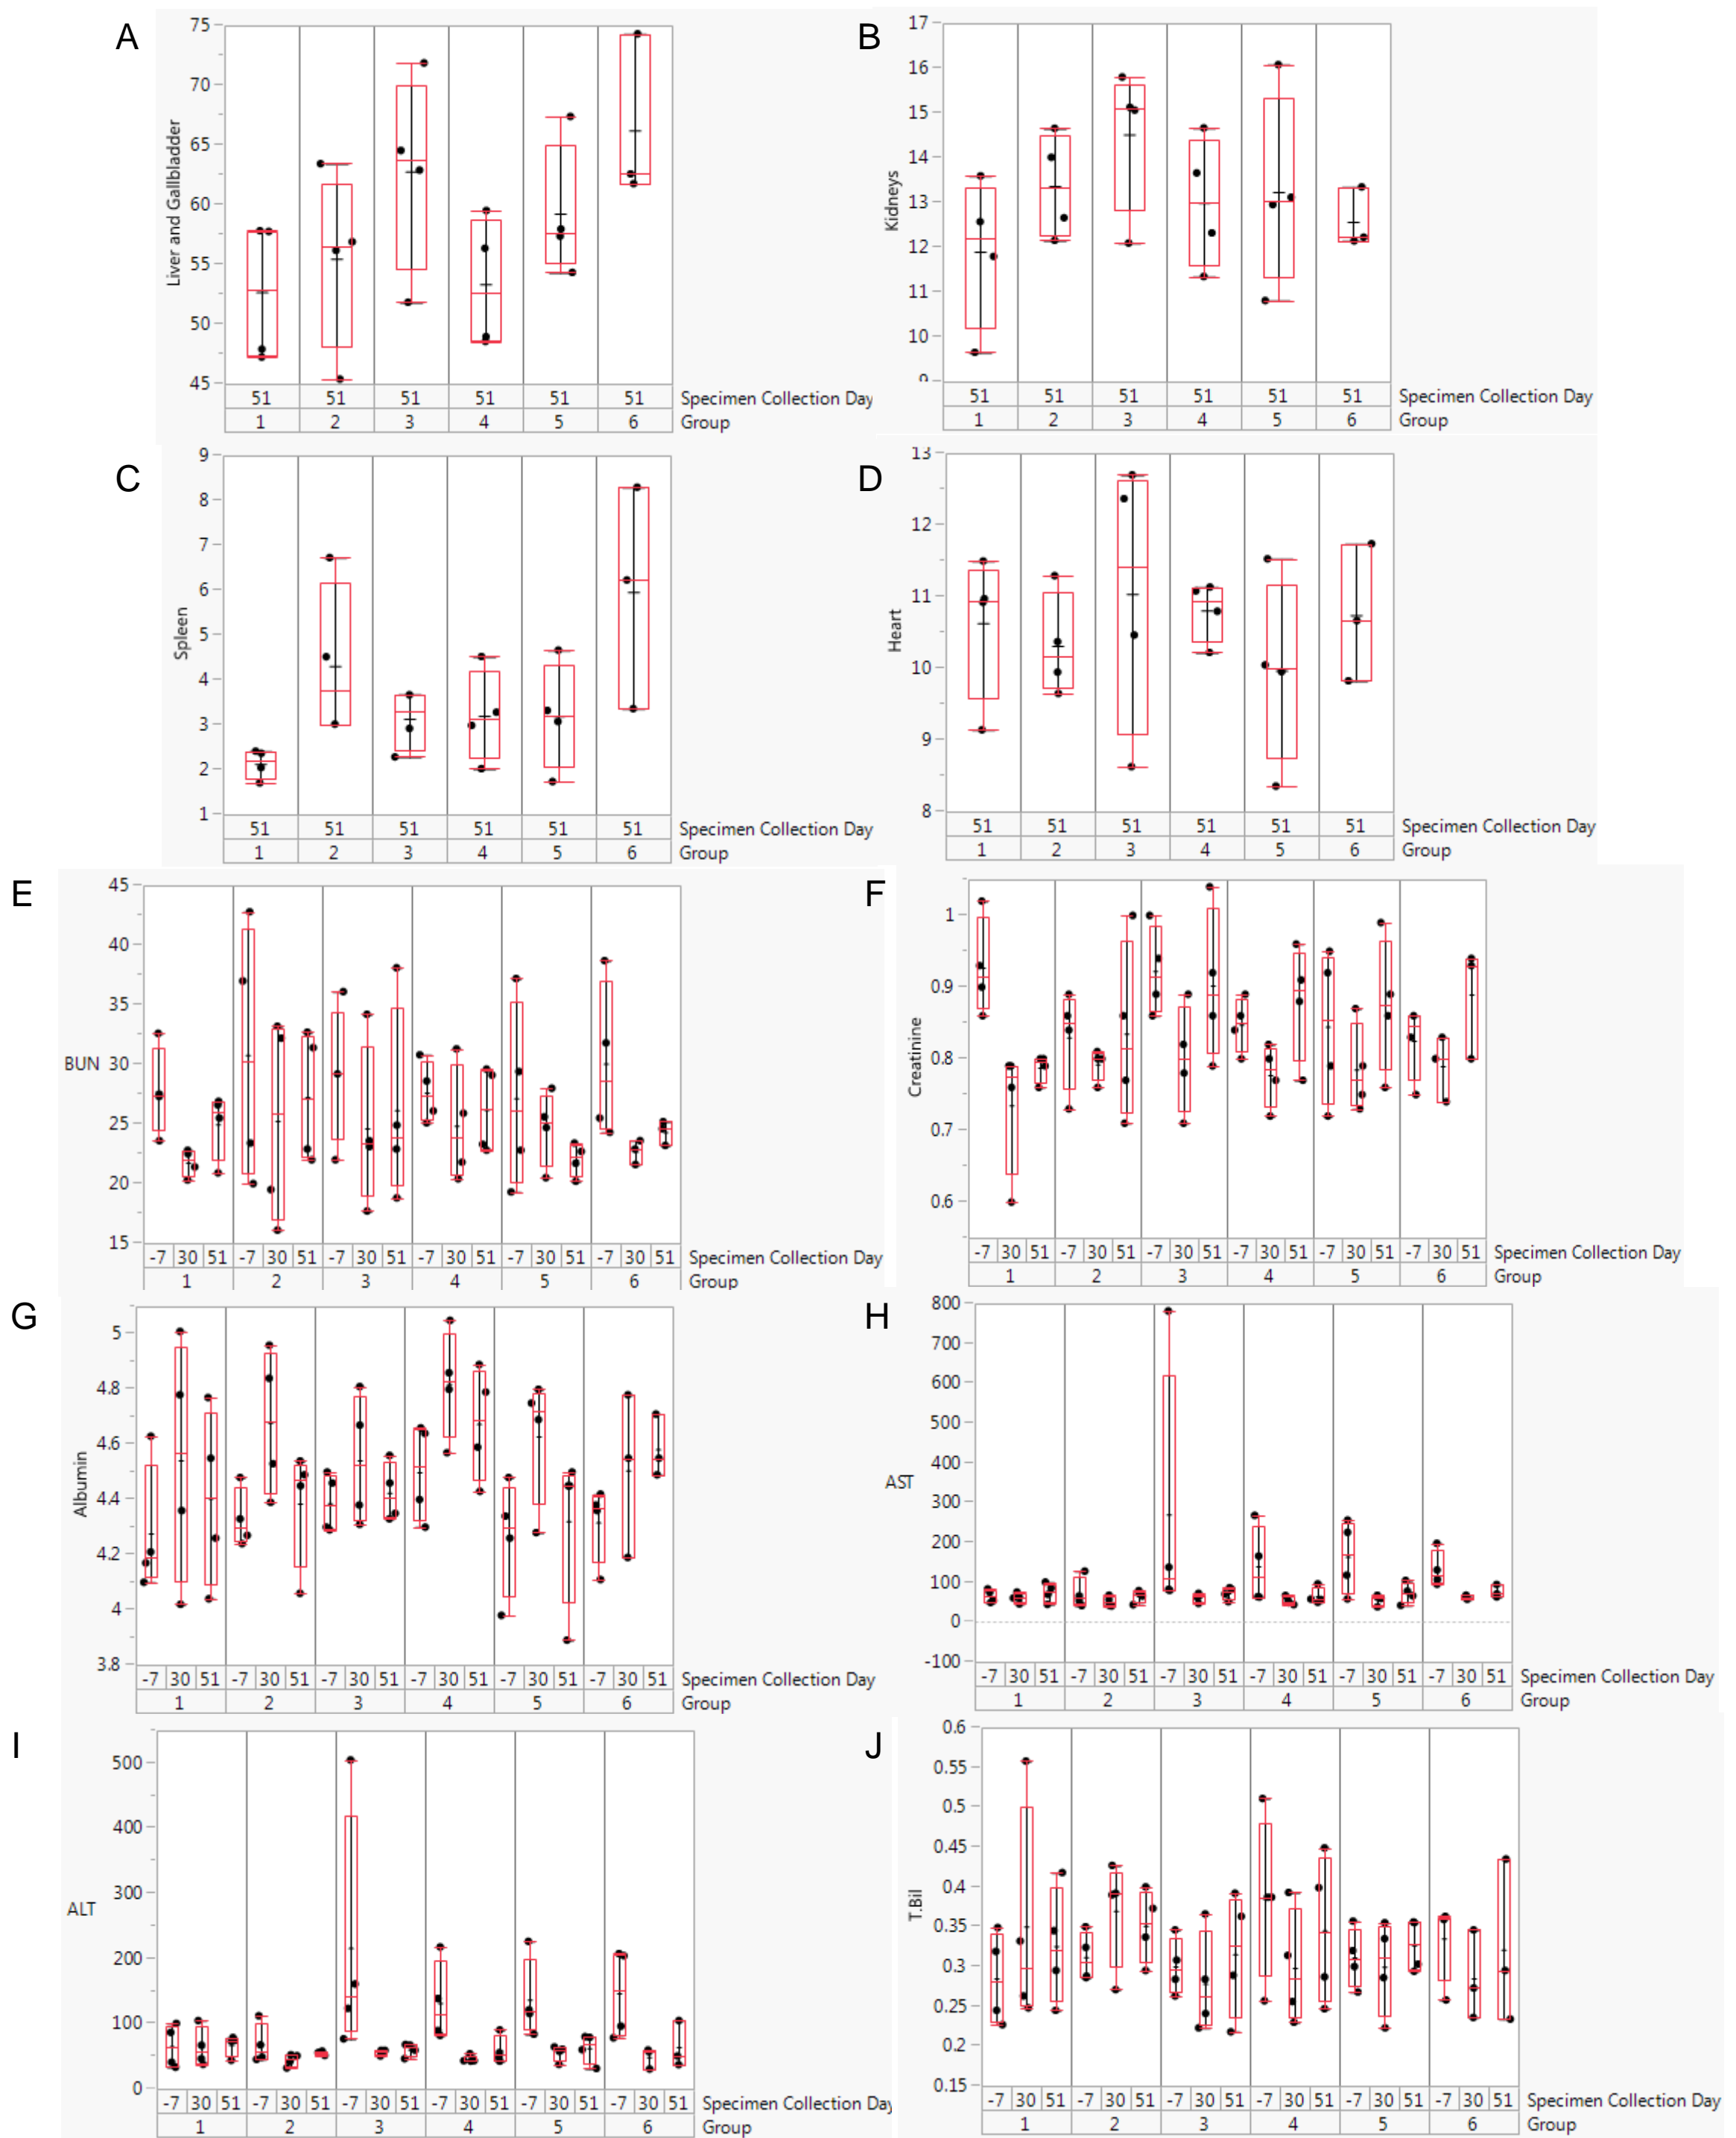

**Supplementary Figure S8.** Tocopherol conjugated ASOs targeting DMPK mRNA were well tolerated in monkeys. Cynomolgus monkeys (n=4/group) were injected subcutaneously with 10 doses of A-dmpk or Toc-dmpk over 7 weeks. Monkeys were sacrificed 48 hours after the last ASO dose and organs were harvested and weighed. All ASOs were well tolerated and did not cause appreciable changes in (A) Liver (B) kidney (C) spleen (D) heart weights. ASO treatment did not cause appreciable changes in (E) Blood urea nitrogen (F) creatinine (G) Albumin (H) AST (I) ALT and (J) Bilirubin as measured on days -7, 30 and 51. Groups 1 represents saline, Groups 2 and 3 represent animals treated with 20 or 40 mg/kg of A-dmpk, Groups 4, 5 and 6 represent animals treated with 10, 20 and 40 mg/kg of Toc-dmpk. Each data point represents an animal.
